# Supplementary material for: Facilitating translational science in anxiety disorders by adjusting extinction training in the laboratory to exposure-based therapy procedures
Source: PubMed Central journal article supplement (PMC7174283; doi:10.1038/s41398-020-0786-x), 2020-04-21

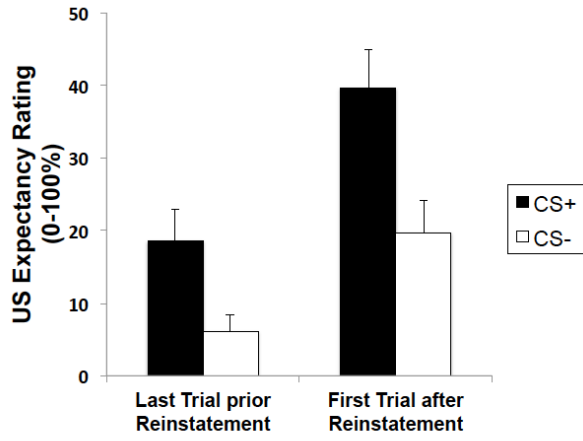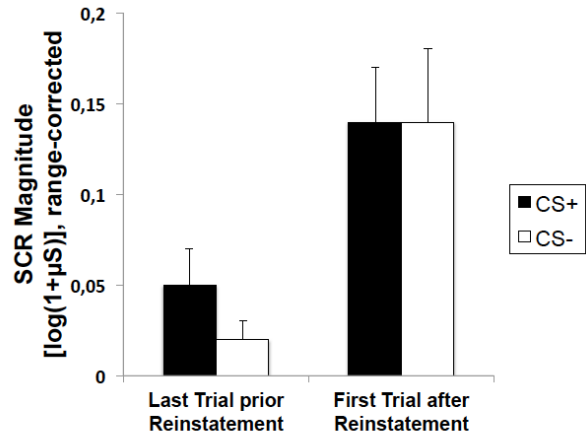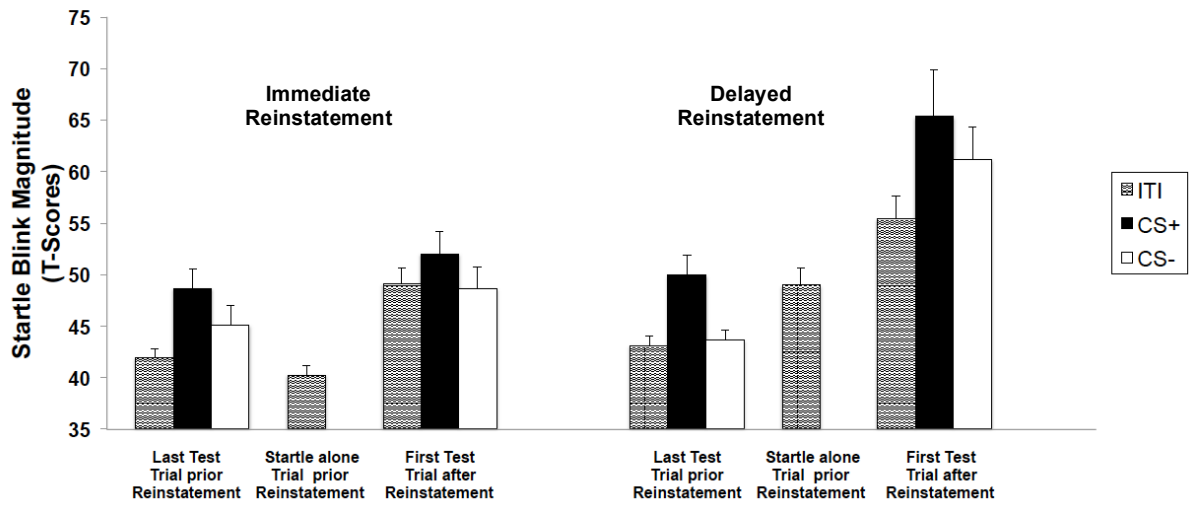

Supplement: 41398_2020_786_MOESM7_ESM.pdf [file 41398_2020_786_MOESM7_ESM.pdf]
